# Supplementary material for: The Effects of Yoga Exercise on Blood Pressure and Hand Grip Strength in Chronic Stroke Patients: A Pilot Controlled Study
Source: Int J Environ Res Public Health. 2023 Jan 8;20(2):1108. doi: 10.3390/ijerph20021108 (PMC9859542; doi:10.3390/ijerph20021108)
Supplement: Supplementary file 1 [file ijerph-20-01108-s001.zip › ijerph-2091836-supplementary.pdf]

## Supplementary Materials:

### File S1. Yoga Class schedule (12 Basic Yoga Pose)

1. All session begins with warm-up(10 minutes) and ends with cold-down(10 minutes): Corpse Pose, mindfulness meditation, deeper/rhythmic breathing practice(inspiration/expiration time around 1:2).
2. Main activities(40 minutes): The yoga teacher who chooses 8-11 pose from the following 「12 Basic Yoga Pose」. In each class, each yoga pose is held for 10-60 seconds followed by 10-20 seconds of rest. Perform each yoga pose 3 to 5 times.

| Position | Photo                                                                                | Yoga Pose                                                    | Number |
|----------|--------------------------------------------------------------------------------------|--------------------------------------------------------------|--------|
| Supine   | 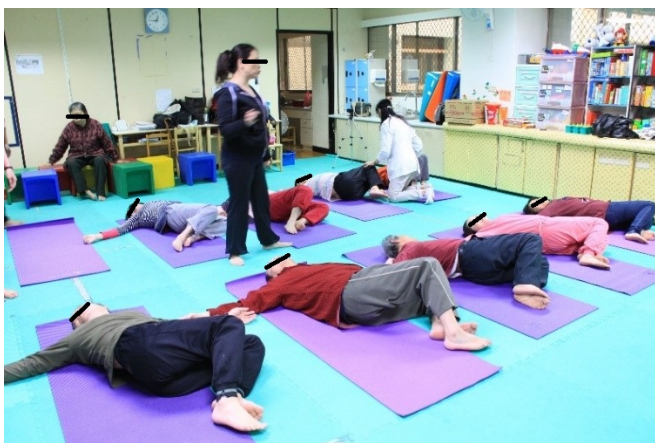  | supine spinal twist pose                                     | 1      |
|          | 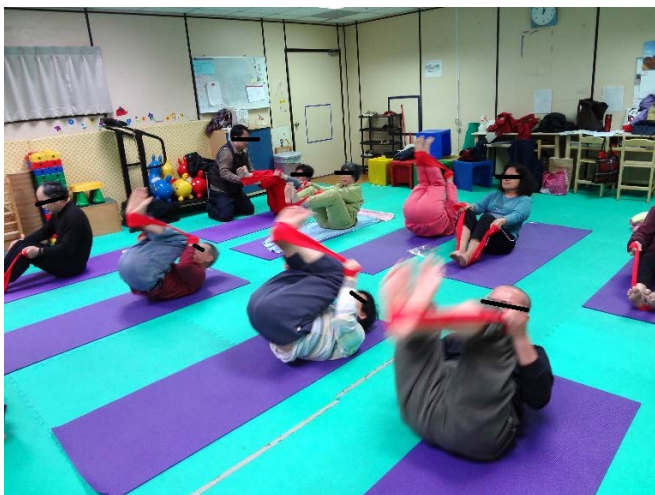 | knee to chest pose with/without integrating resistance bands | 2      |

|                 |                                                                                      |                                                                   |   |
|-----------------|--------------------------------------------------------------------------------------|-------------------------------------------------------------------|---|
|                 | 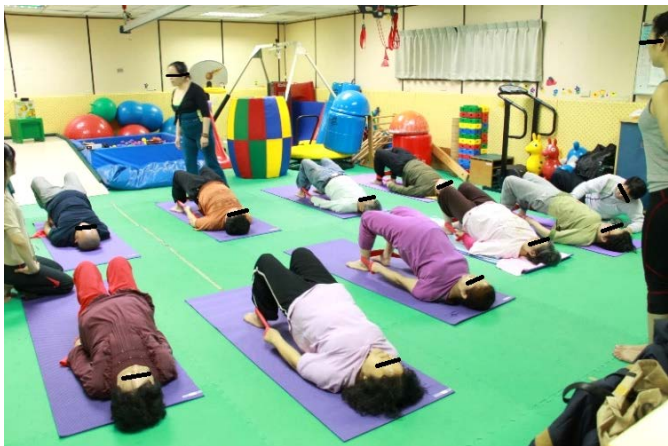   | bridge pose<br>with/without<br>integrating<br>resistance<br>bands | 3 |
| Prone           | 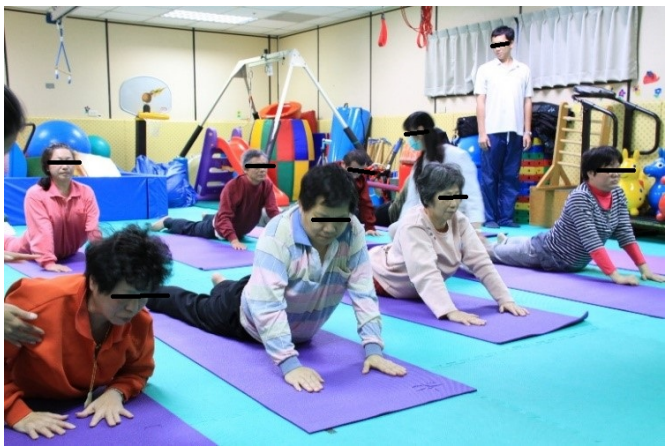  | cobra pose                                                        | 4 |
| Mat<br>exercise | 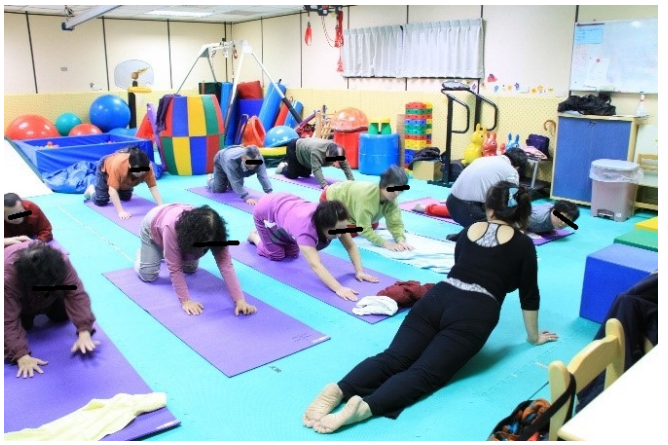 | cat pose                                                          | 5 |

|        |                                                                                      |                                                   |   |
|--------|--------------------------------------------------------------------------------------|---------------------------------------------------|---|
|        | 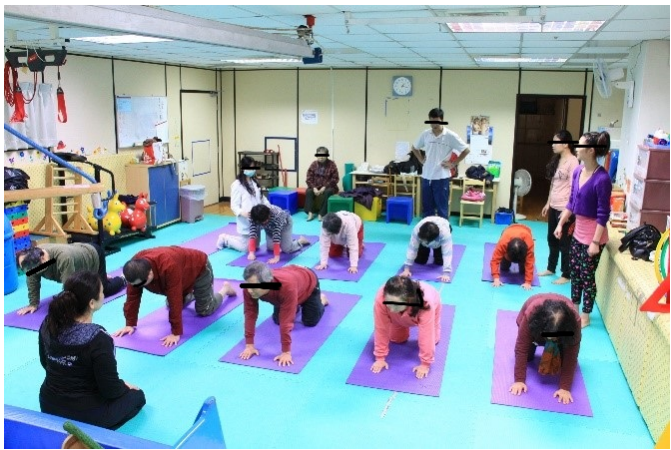   | cow pose                                          | 6 |
|        | 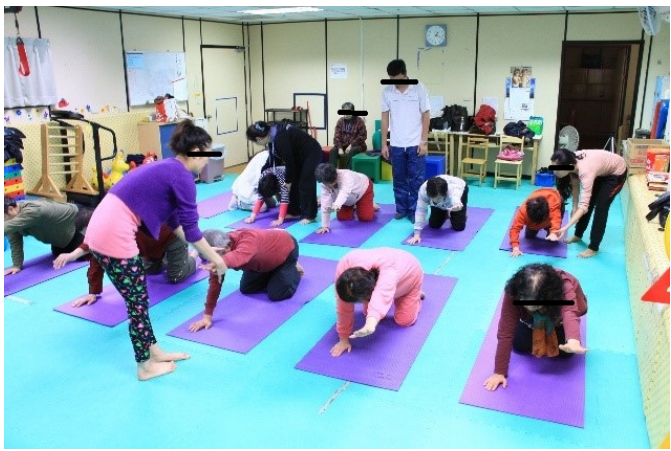  | modified<br>balancing<br>table pose               | 7 |
| Seated | 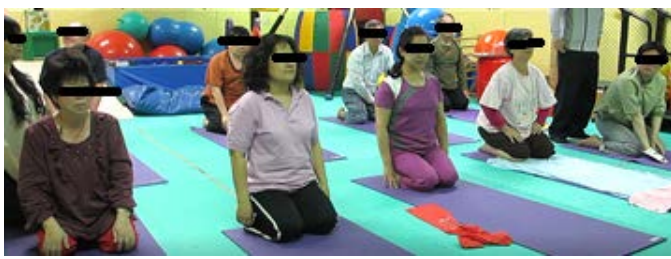 | hero pose                                         | 8 |
|        | 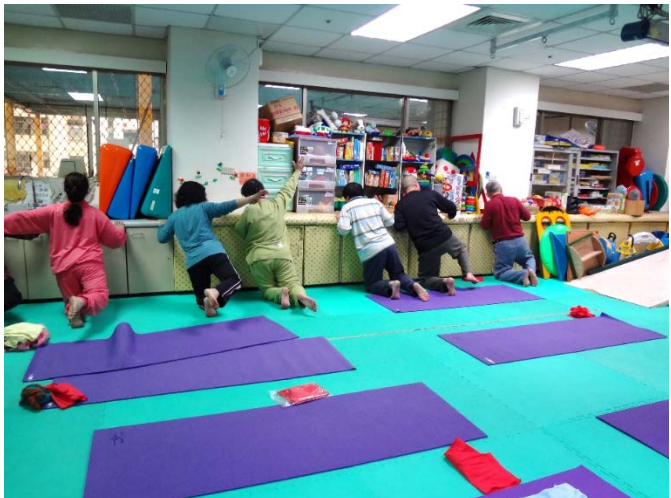 | kneeling pose<br>with<br>balancing on<br>one knee | 9 |

|          |                                                                                      |                                                      |    |
|----------|--------------------------------------------------------------------------------------|------------------------------------------------------|----|
|          | 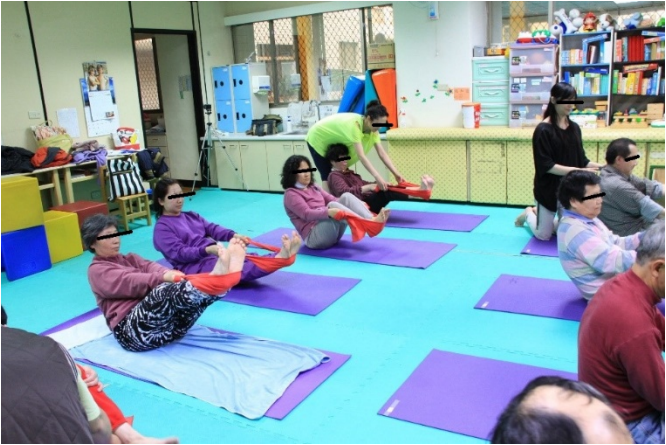   | modified boat pose with integrating resistance bands | 10 |
|          | 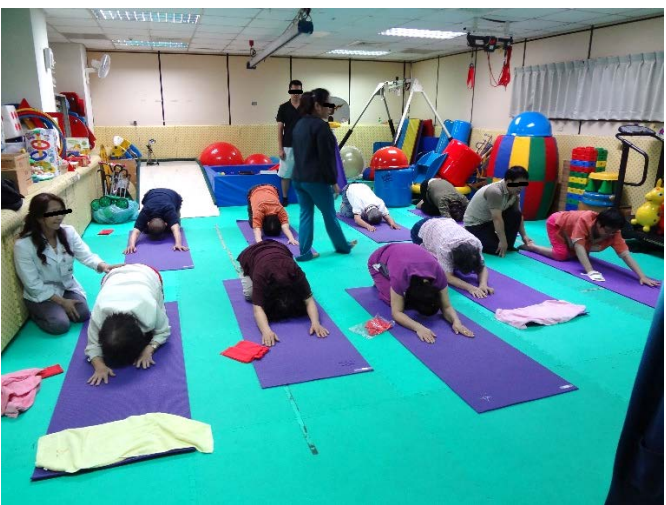  | hare pose                                            | 11 |
| Standing | 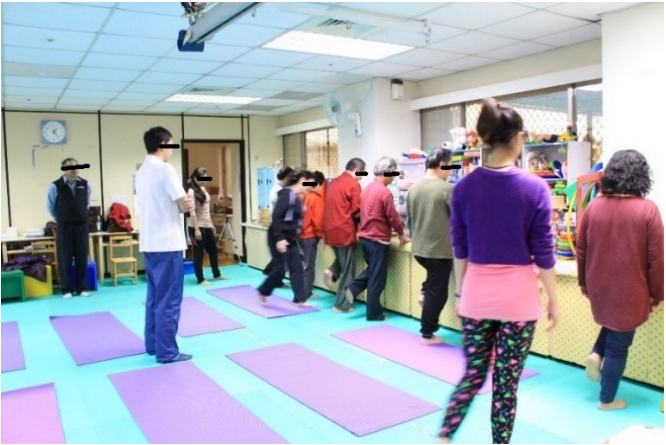 | modified tree pose                                   | 12 |

**File S2. Standard stroke rehabilitation**

2. Frequency: 3 sessions in each week
3. Time: 60 minutes in each session.
4. Training methods included

Resistance exercise: weight-bearing training to increase the muscle strength of the lower limbs, such as repeated sit-to-stand training, or the use of equipment to increase the muscle strength of the lower limbs, such as progressive resistance training machines and stationary bicycles.

Repetitive task-oriented training (include dynamic balance exercises and weight-shift training): sit-to-stand training, transfer, ambulation and going up and down stairs training.

The physiotherapist who chooses 3-4 types of exercises from the following types of exercise. Perform each repeat each types of exercise 15 to 20 minutes.

| Types                 | Photo                                                                                                                                                                                                                                                                                                                                                                                                                                                                                                                                                                                                                                                                                                                                                                                                                                                                                                                                                                                                                                            |
|-----------------------|--------------------------------------------------------------------------------------------------------------------------------------------------------------------------------------------------------------------------------------------------------------------------------------------------------------------------------------------------------------------------------------------------------------------------------------------------------------------------------------------------------------------------------------------------------------------------------------------------------------------------------------------------------------------------------------------------------------------------------------------------------------------------------------------------------------------------------------------------------------------------------------------------------------------------------------------------------------------------------------------------------------------------------------------------|
| sit-to-stand training | 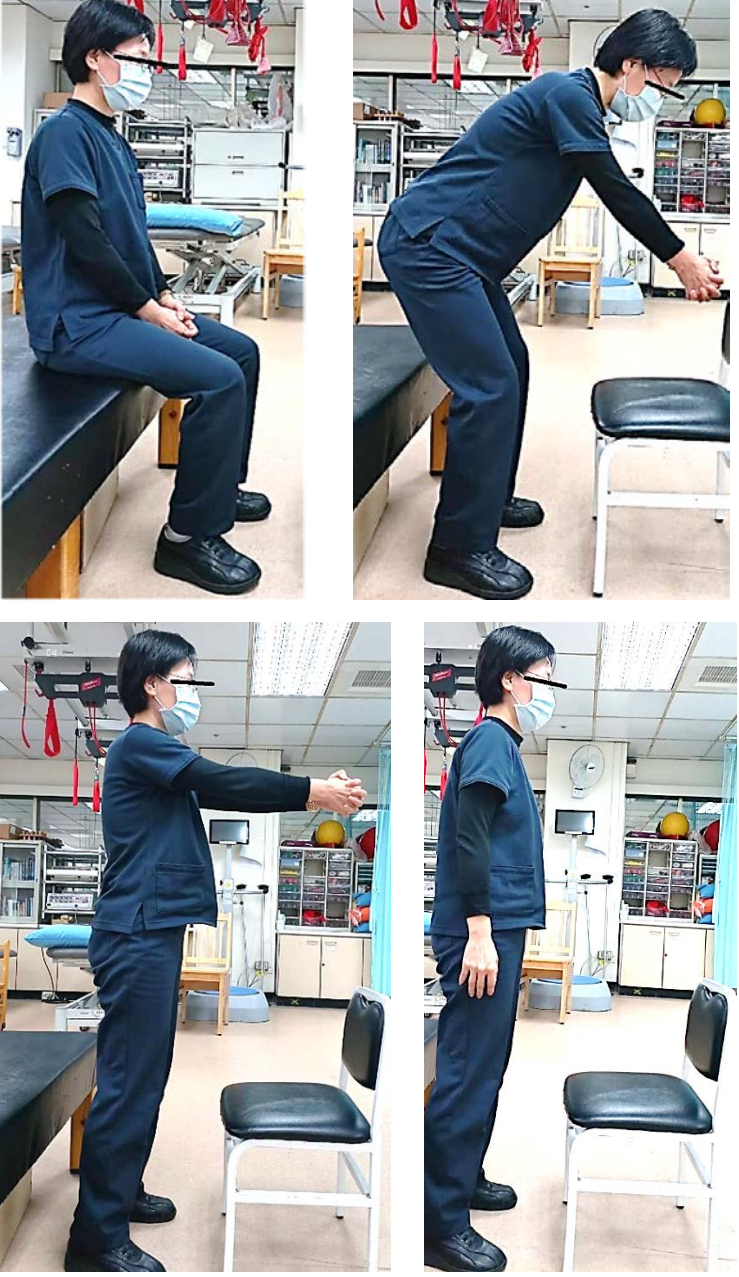 <p>The 'Photo' column contains four sequential images of a person in dark blue scrubs and a face mask performing a sit-to-stand exercise in a clinical room.      <ul style="list-style-type: none"> <li><b>Top-left:</b> The person is sitting on the edge of a black examination table, legs extended forward, hands resting on their thighs.</li> <li><b>Top-right:</b> The person is leaning forward from the hips, reaching their hands down towards the seat of a white chair with a black cushion.</li> <li><b>Bottom-left:</b> The person is in the process of standing, with their hands firmly gripping the top of the white chair for support.</li> <li><b>Bottom-right:</b> The person is fully standing upright, facing forward, with their hands resting at their sides. The white chair remains in front of them.</li> </ul>     The background of all photos shows a clinical environment with medical equipment, shelves, and a window.</p> |

progressive  
resistance  
training  
machines

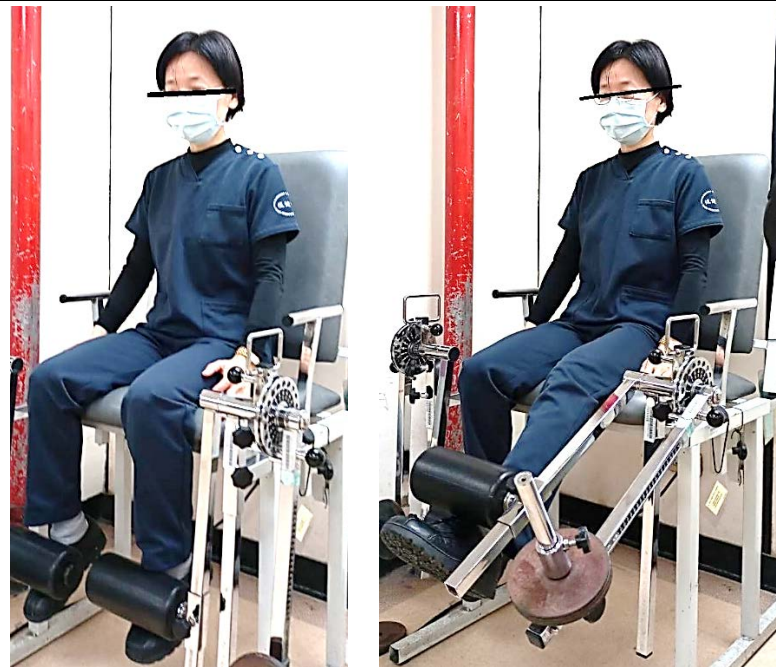

stationary  
bicycles

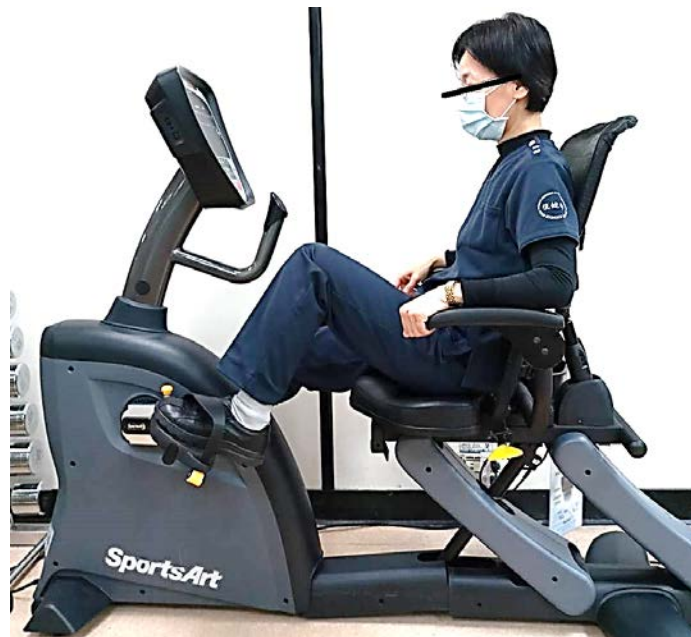

ambulation

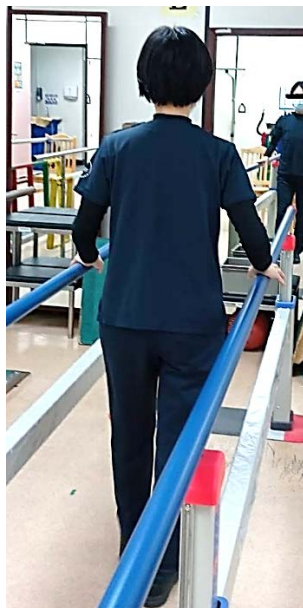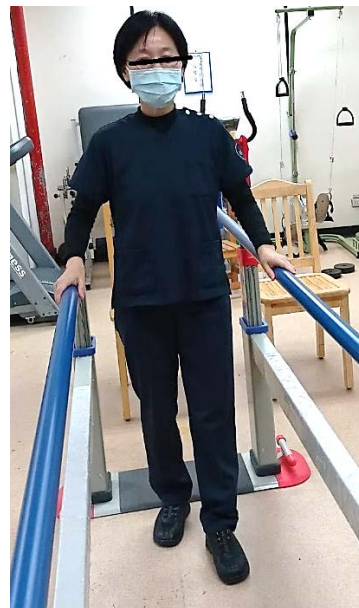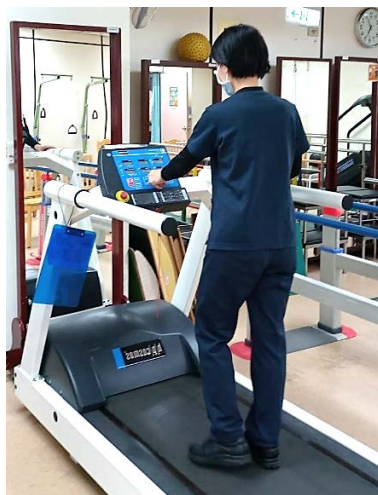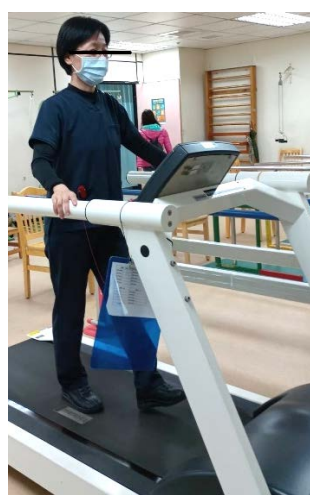

going up and  
down stairs

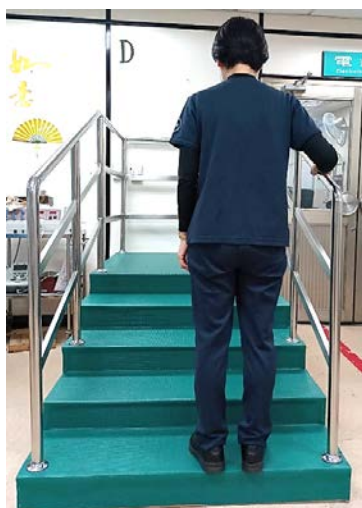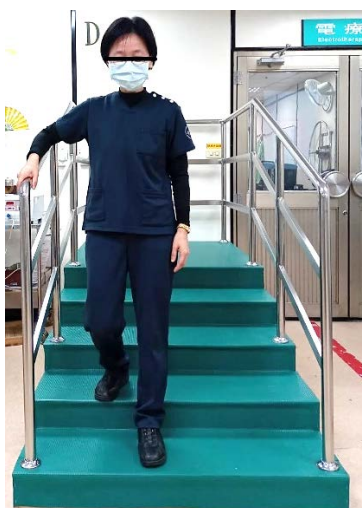

### File S3. Hand grip strength test

Grip strength was measured by a handheld dynamometer (TTM-YD, Tokyo, Japan) and protocol as below.

#1. The tester adjusts the grip of the grip dynamometer so that when the subject's "hand" holds the grip, its proximal interphalangeal (pip) joint forms a right angle.

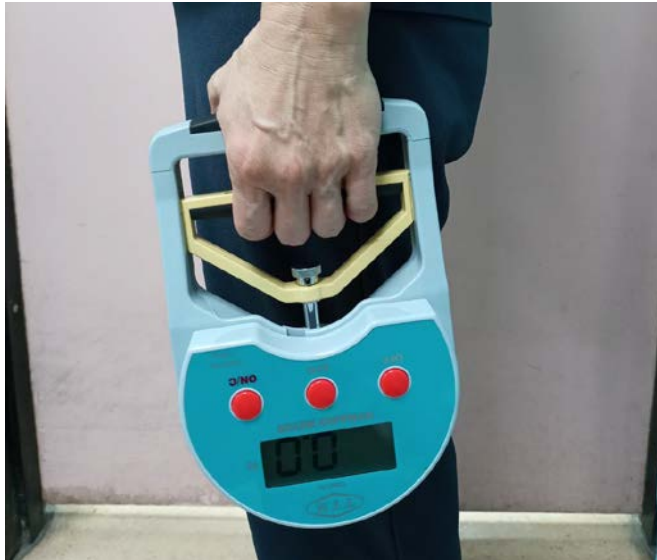

#2. The subjects stretched their arms and drooped naturally, looked straight ahead with both eyes, and paid attention that the grip dynamometer did not touch the body.

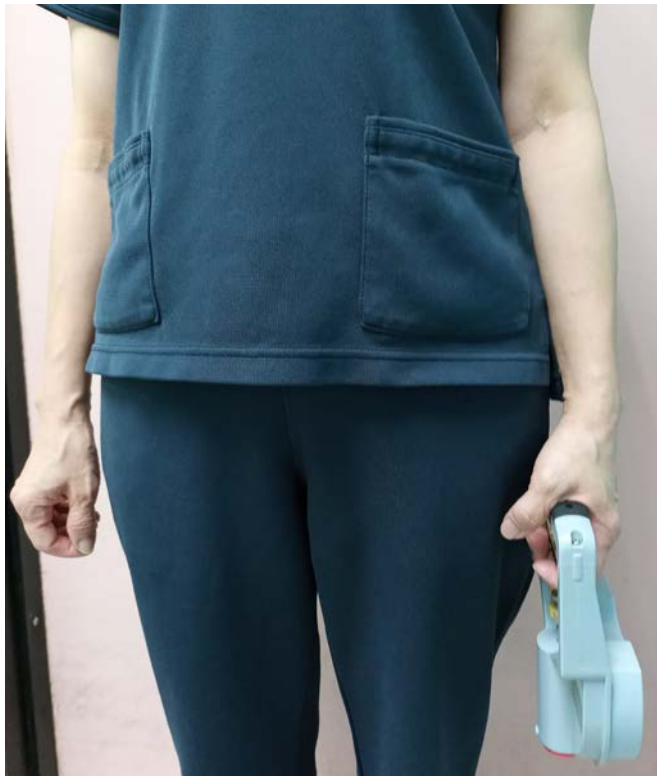

#3. According to this, a total of two measurements should be taken, and there should

be an appropriate rest for about one minute between the two measurements.

#4. Recording method: in kilograms, read up to 0.1 kilograms
